# Supplementary material
Source: Research Square preprint supplement (doi:10.21203/rs.3.rs-9005389/v1)

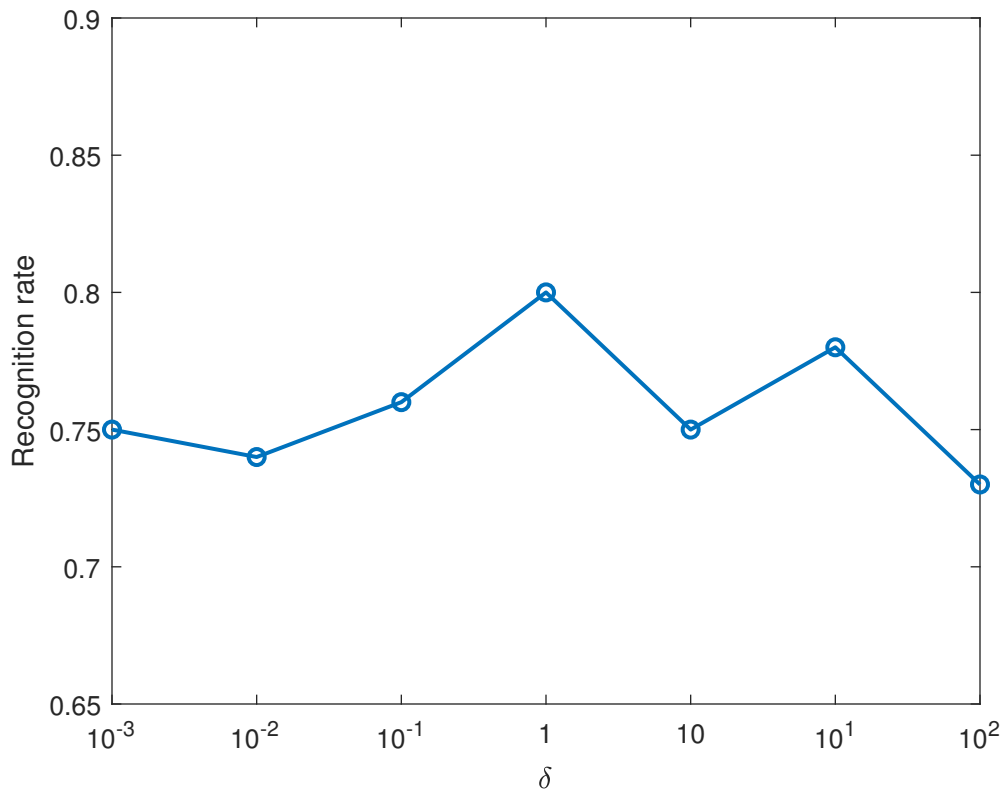

Supplement: Supplementary file 1 [file 图2.1.pdf › 图2.1.pdf]

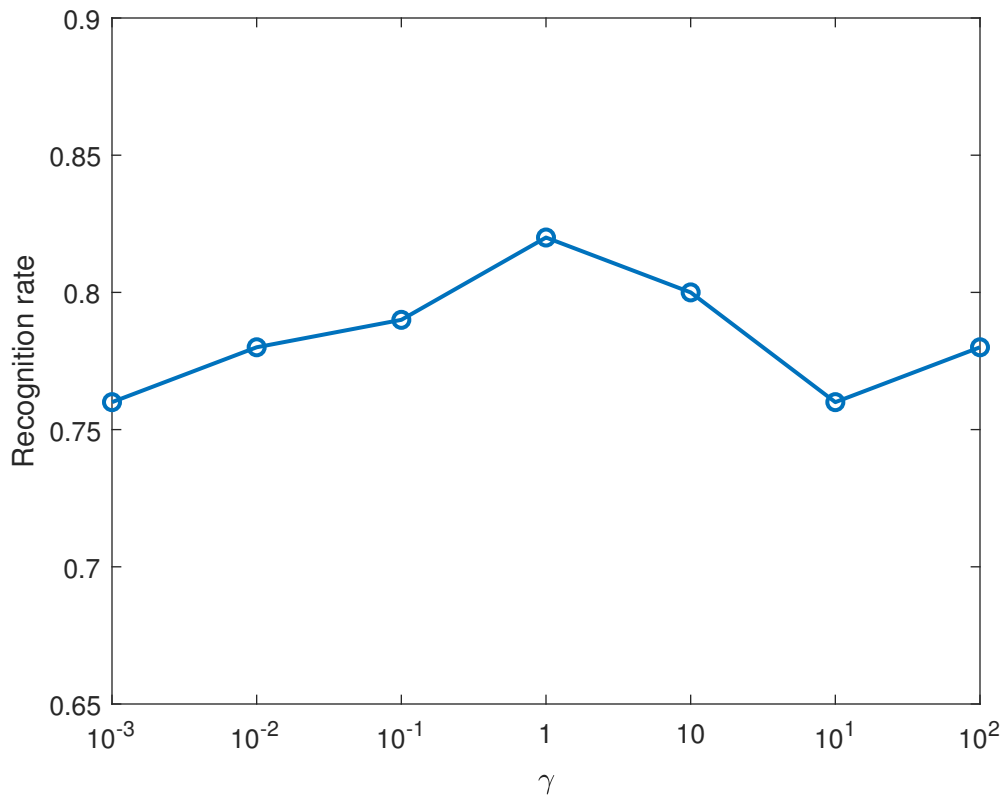

Supplement: Supplementary file 2 [file 图2.2.pdf › 图2.2.pdf]

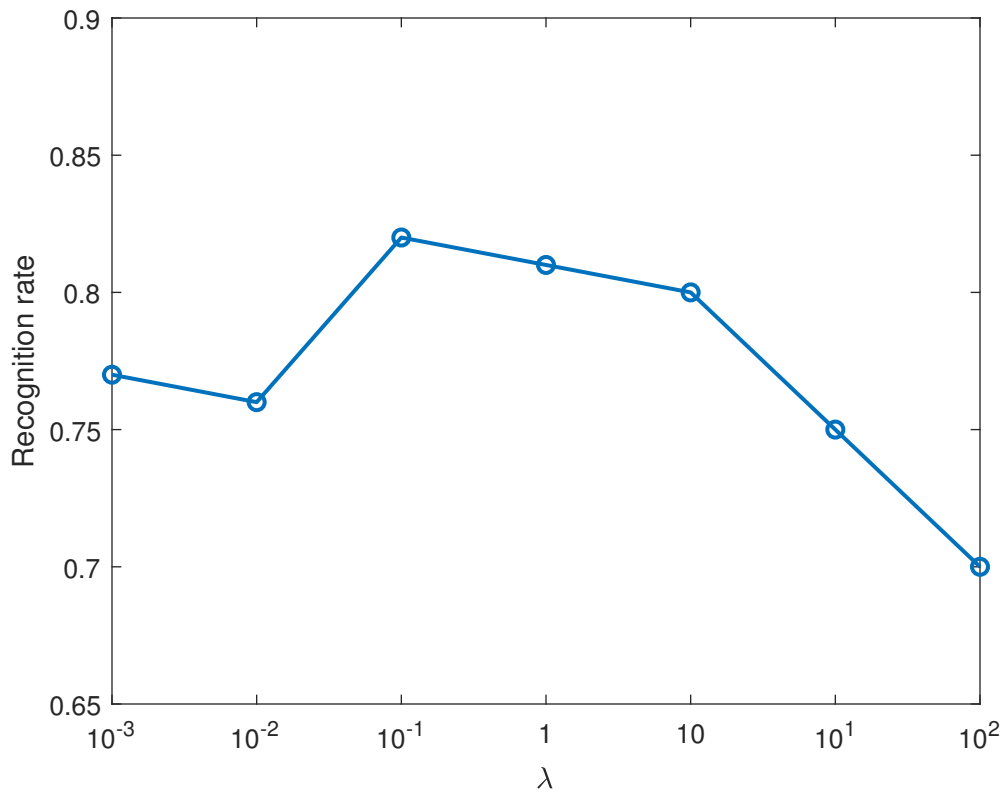

Supplement: Supplementary file 3 [file 图2.3.pdf › 图2.3.pdf]

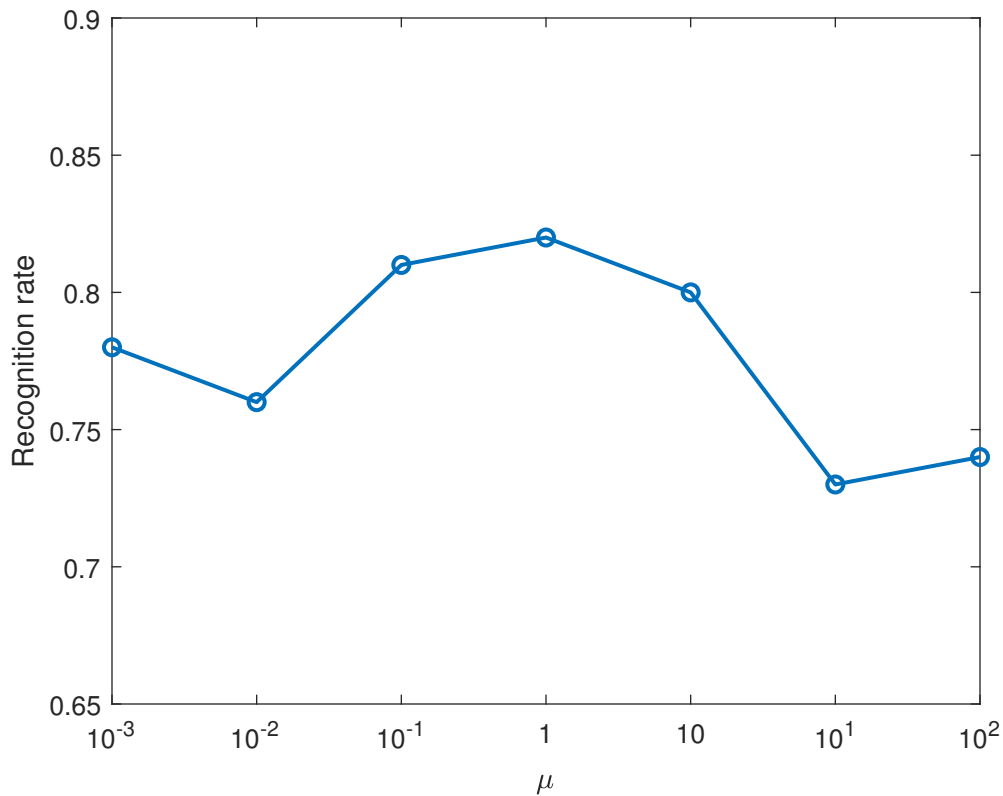

Supplement: Supplementary file 4 [file 图2.4.pdf › 图2.4.pdf]
